# Supplementary material for: Biocompatibility and Bioimaging Application of Carbon Nanoparticles Synthesized by Phosphorus Pentoxide Combustion Method
Source: Hindawi journal article supplement (doi:10.1155/2015/761517), 2015-01-01
Supplement: f1 [file 761517.f1.pdf]

## Supporting Information

### Biocompatibility and Bio-imaging Application of Carbon Nanoparticles Synthesized by Phosphorus Pentoxide Combustion Method

Shibsekhar Roy,<sup>\*a</sup> Barbara Korzeniowska,<sup>a</sup> Chandra K. Dixit,<sup>b</sup> Gowri Manickam,<sup>c</sup>  
Stephen Daniels,<sup>c,d</sup> Colette McDonagh<sup>a,c</sup>

<sup>a</sup>National Biophotonics and Imaging Platform, School of Physical Sciences, Dublin City University, Glasnevin, Dublin 9, Ireland

<sup>b</sup>National Biophotonics and Imaging Platform, School of Biotechnology, Dublin City University, Glasnevin, Dublin 9, Ireland

<sup>c</sup> Biomedical Diagnostics Institute, Dublin City University, Glasnevin, Dublin 9, Ireland

<sup>d</sup> School of Electronic Engineering, Dublin City University, Dublin 9, Ireland.

# Fluorescence Image Analysis

## **Matlab <sup>TM</sup> script**

```
grayImage = imread('D:\shib\results\Confocal\cDOT_platelet\3control.png');  
  
[rows columns numberOfColorBands] = size(grayImage);  
  
subplot(2, 2, 1);  
  
imshow(grayImage);  
  
binaryImage = grayImage > 25;  
  
subplot(2, 2, 3);  
  
numberOfBlackPixels = sum(sum(binaryImage == 0));  
  
totalNumberOfPixels = rows * columns;  
  
percentBlackPixels = 100.0 * numberOfBlackPixels /totalNumberOfPixels
```

**Figure S1:** Fluorescence quantum efficiency data for the reference dye and the CNPs

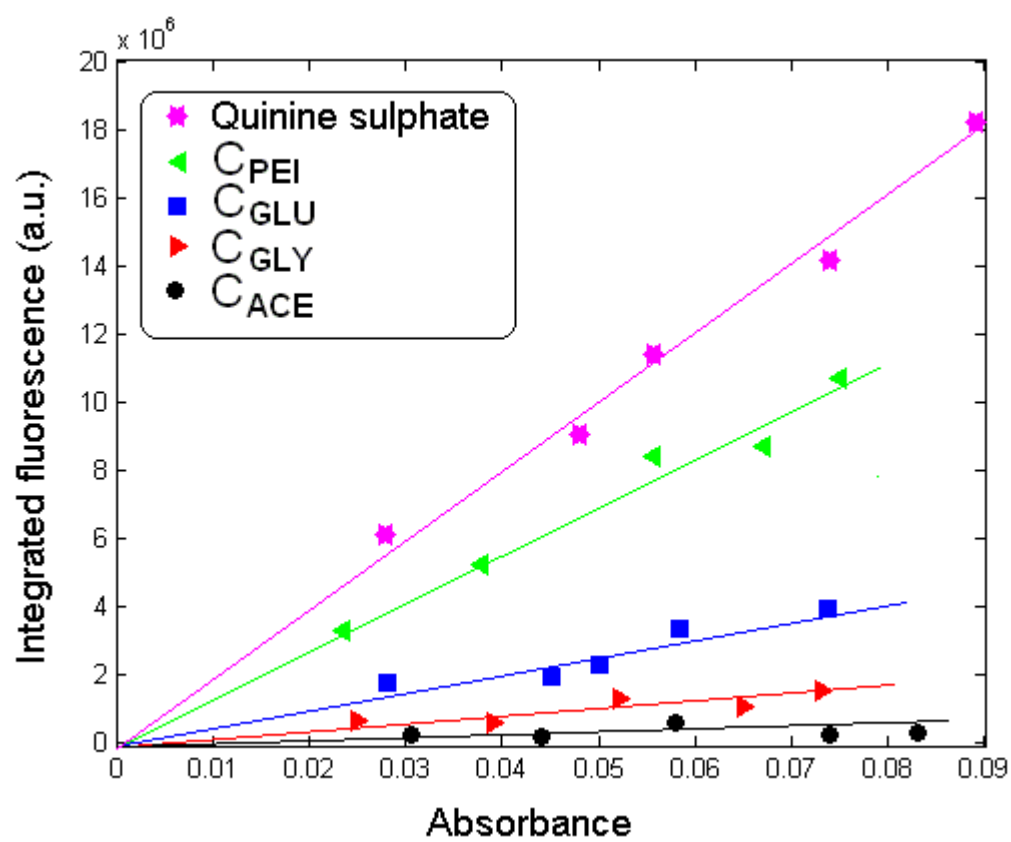

**Figure S2:** TCSPC data for the measurement of fluorescence lifetime. (IRF = Instrument response function)

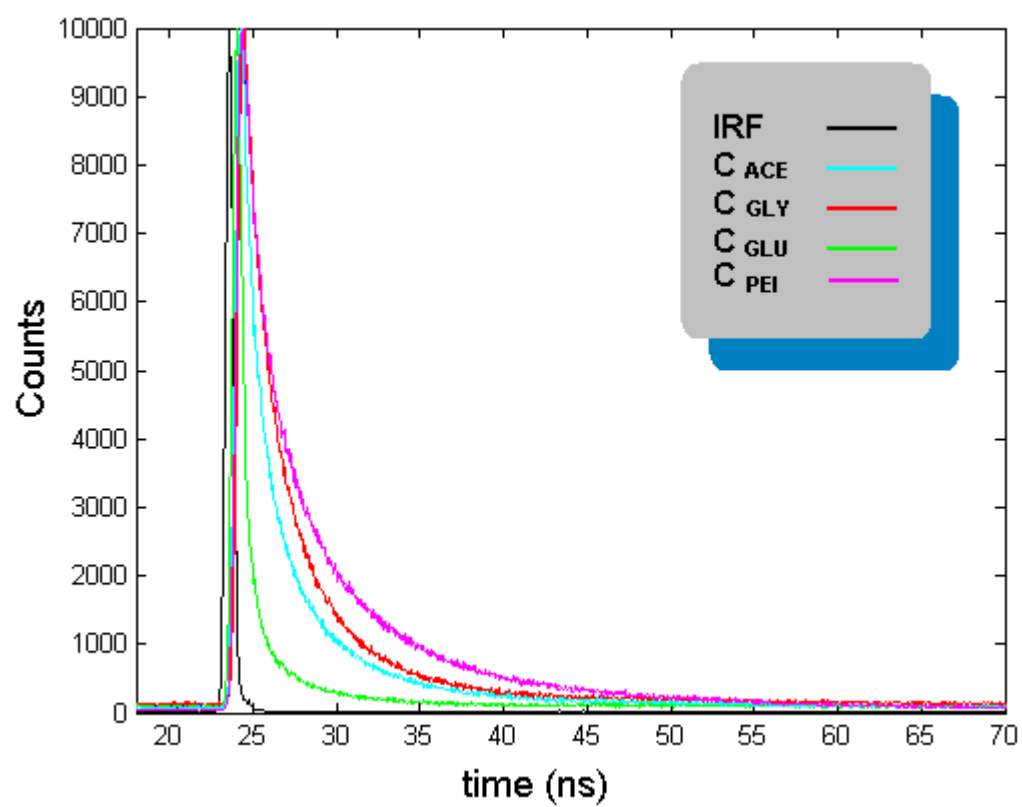

**Figure S3:** Fluorescence microscopy images for the CNPs showing one set of images for IgG control and three sets for anti-CD41. The calculated fluorescence intensity values in relation to Figure 6 are reported in each micrograph.

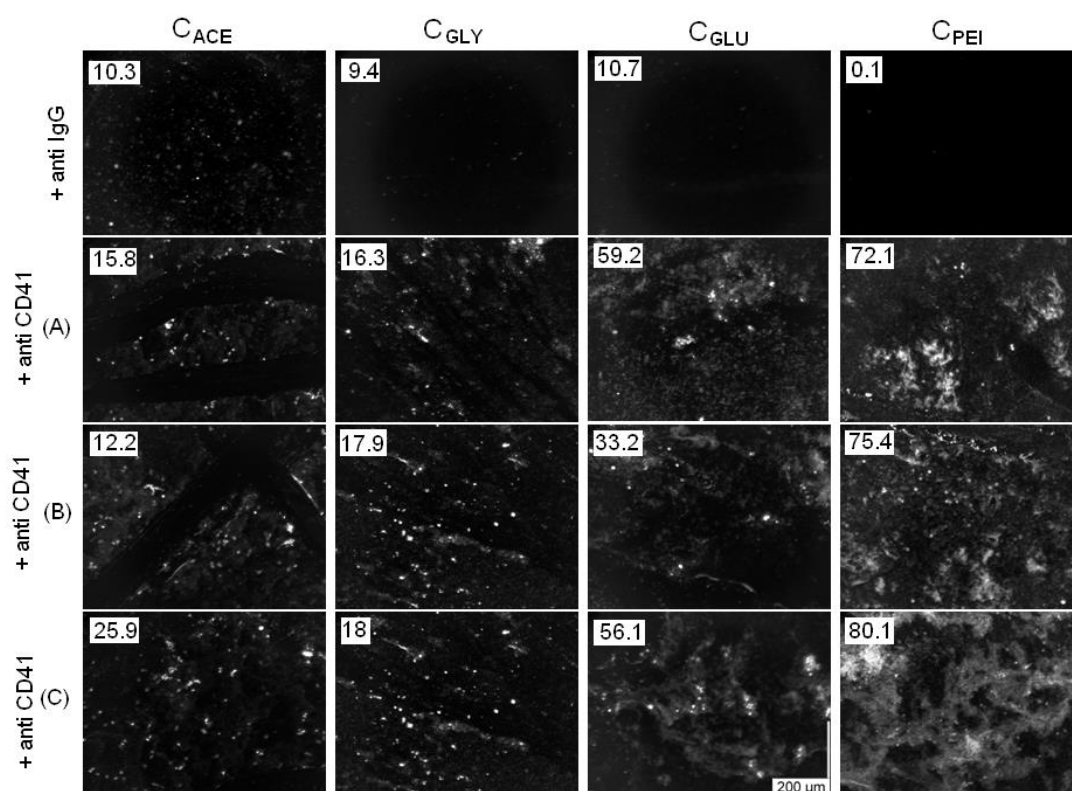

**Figure S4:** ANOVA analysis for the cell viability of U2OS cell lines in the presence of various concentrations of CNPs.

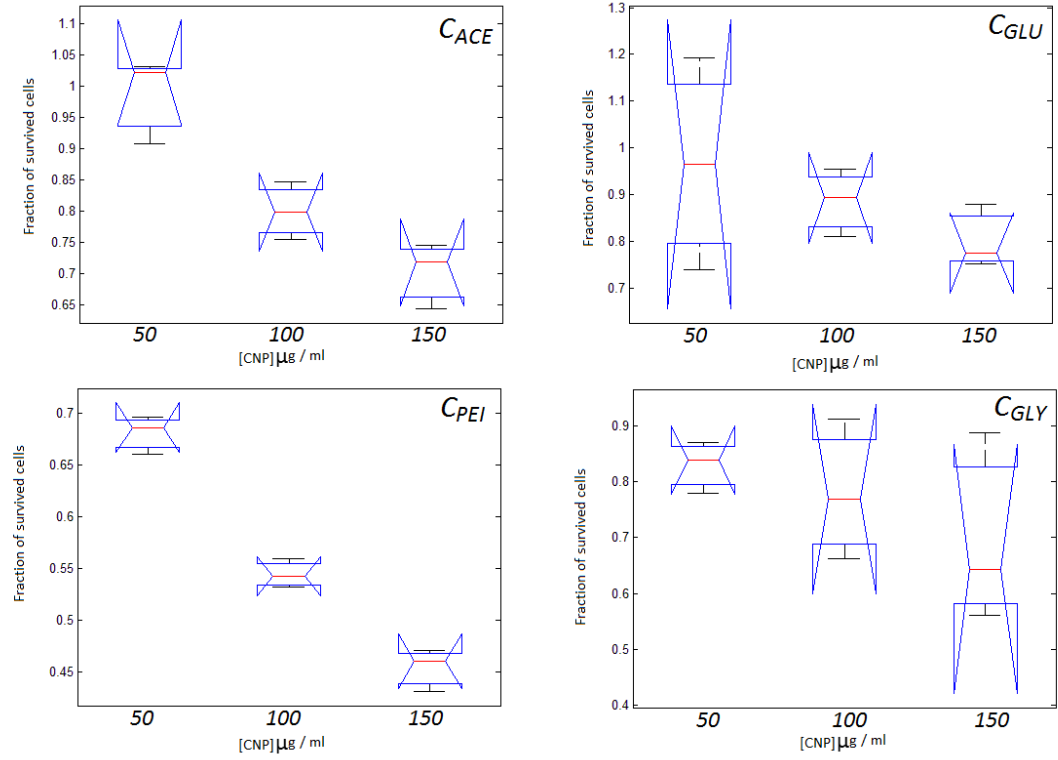

**Table S1:** ANOVA table for the CNPs

| <b>CNP</b>             | <b>Parameters</b> | <b>Sum of squares</b> | <b>Degrees of freedom</b> | <b>Mean square</b> | <b>F</b> | <b>Significance</b> |
|------------------------|-------------------|-----------------------|---------------------------|--------------------|----------|---------------------|
| <b>C<sub>ACE</sub></b> | <b>Columns</b>    | 0.12622               | 2                         | 0.06311            | 19.63    | 0.0023              |
|                        | <b>Error</b>      | 0.09129               | 6                         | 0.00322            |          |                     |
|                        | <b>Total</b>      | 0.14551               | 8                         |                    |          |                     |
| <b>C<sub>GLY</sub></b> | <b>Columns</b>    | 0.04015               | 2                         | 0.02008            | 0.98     | 0.4281              |
|                        | <b>Error</b>      | 0.12285               | 6                         | 0.02048            |          |                     |
|                        | <b>Total</b>      | 0.16301               | 8                         |                    |          |                     |
| <b>C<sub>PEI</sub></b> | <b>Columns</b>    | 0.07842               | 2                         | 0.03921            | 124.52   | 1.3019e-005         |
|                        | <b>Error</b>      | 0.00189               | 6                         | 0.00031            |          |                     |
|                        | <b>Total</b>      | 0.08031               | 8                         |                    |          |                     |
| <b>C<sub>GLU</sub></b> | <b>Columns</b>    | 0.0269                | 2                         | 0.01345            | 0.87     | 0.4671              |
|                        | <b>Error</b>      | 0.09313               | 6                         | 0.01552            |          |                     |
|                        | <b>Total</b>      | 0.12003               | 8                         |                    |          |                     |

**Table S2:** Mean Zeta potential table at various stages of surface functionalization

| <b>Sample</b>          | <b>In MilliQ<br/>(mV)</b> | <b>In PBS<br/>(mV)</b> | <b>+ APTES<br/>(mV)</b> | <b>+ anti-CD41<br/>(mV)</b> |
|------------------------|---------------------------|------------------------|-------------------------|-----------------------------|
| <b>C<sub>ACE</sub></b> | -20.5                     | -19.8                  | -14.6                   | -20.6                       |
| <b>C<sub>GLY</sub></b> | -26.2                     | -24.3                  | -20.7                   | -26.9                       |
| <b>C<sub>GLU</sub></b> | -34.3                     | -32.2                  | -27.6                   | -31.3                       |
| <b>C<sub>PEI</sub></b> | -31.8                     | -29.7                  | -25.3                   | -33.2                       |
